# Supplementary material for: Effects of new lipid ingredients during pregnancy and lactation on rat offspring brain gene expression
Source: Royal Society of Chemistry journal article supplement (doi:10.1039/d4fo04425h), 2024-12-11
Supplement: d4fo04425h1.pdf [file d4fo04425h1.pdf]

Annex 1. GO processes affected in fetal brain from groups A (a) and B (b) compared to control, classified by enrichment score. GO, gene ontology.

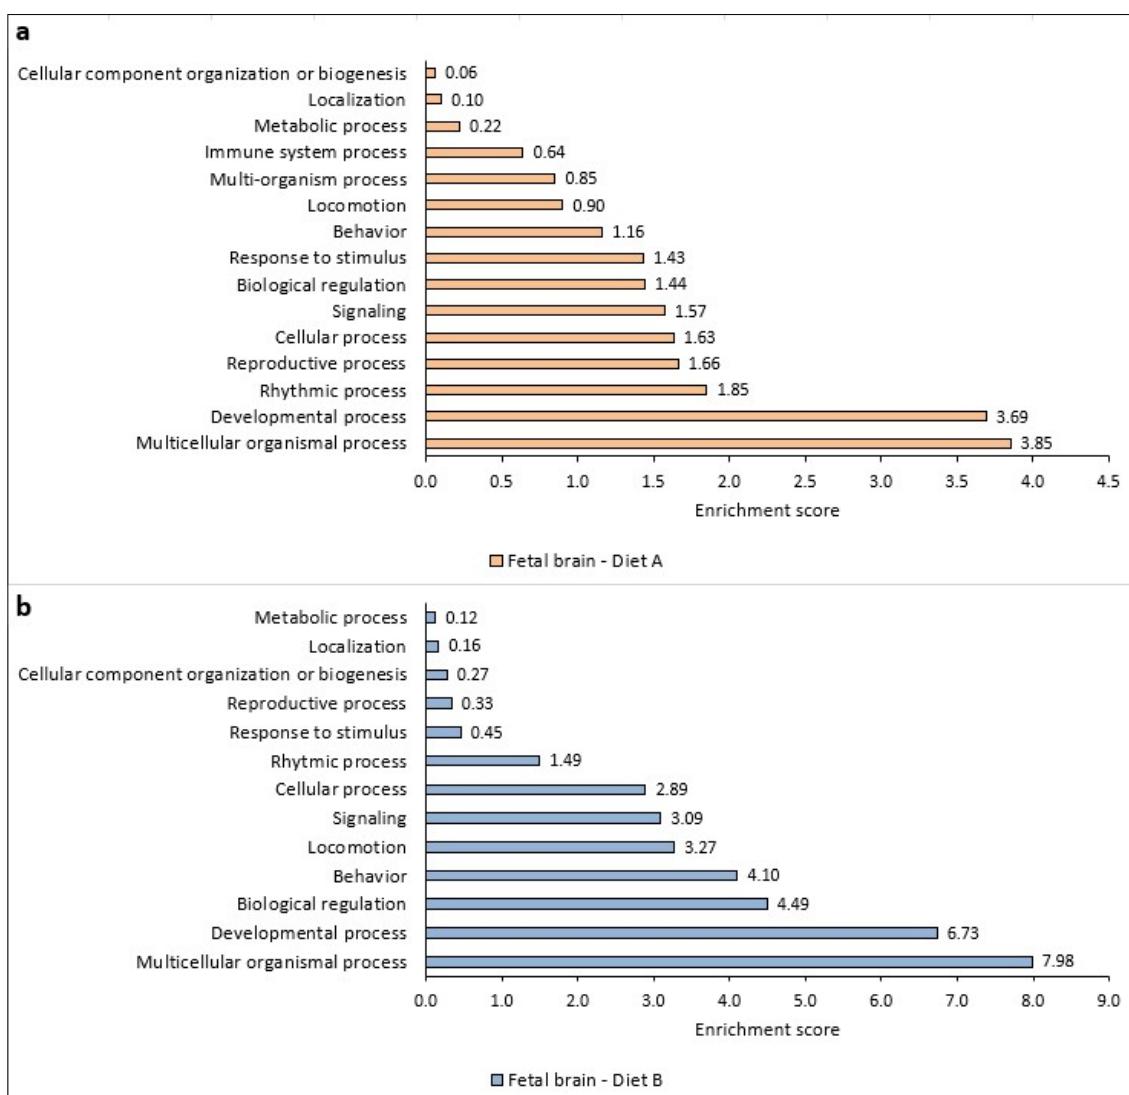

Annex 2. KEGG pathways affected in fetal brain from groups A and B compared to control, classified by enrichment score. KEGG, Kyoto encyclopedia of genes and genomes.

| KEGG Pathway                            | Enrichment score | <i>P</i> | Genes in the pathway |
|-----------------------------------------|------------------|----------|----------------------|
| <b>Diet A</b>                           |                  |          |                      |
| Tyrosine metabolism                     | 4.20             | 0.015    | <i>Dbh</i>           |
| Tryptophan metabolism                   | 3.97             | 0.019    | <i>Tph2</i>          |
| Amyotrophic lateral sclerosis           | 3.81             | 0.022    | <i>Prph</i>          |
| Serotonergic synapse                    | 2.95             | 0.052    | <i>Tph2</i>          |
| Metabolic pathways                      | 2.60             | 0.074    | <i>Dbh, Tph2</i>     |
| <b>Diet B</b>                           |                  |          |                      |
| Tryptophan metabolism                   | 3.97             | 0.019    | <i>Tph2</i>          |
| Cholinergic synapse                     | 3.08             | 0.046    | <i>Chrm1</i>         |
| Serotonergic synapse                    | 2.95             | 0.052    | <i>Tph2</i>          |
| FoxO signaling pathway                  | 2.89             | 0.056    | <i>Foxg1</i>         |
| Calcium signaling pathway               | 2.58             | 0.075    | <i>Chrm1</i>         |
| Regulation of actin cytoskeleton        | 2.43             | 0.088    | <i>Chrm1</i>         |
| Neuroactive ligand-receptor interaction | 2.16             | 0.116    | <i>Chrm1</i>         |
| PI3K-Akt signaling pathway              | 2.01             | 0.134    | <i>Chrm1</i>         |
| Metabolic pathways                      | 0.86             | 0.422    | <i>Tph2</i>          |

Annex 3. GO processes affected in 14-day-old pup's brain from groups A (a) and B (b) compared to control, classified by enrichment score. GO, gene ontology.

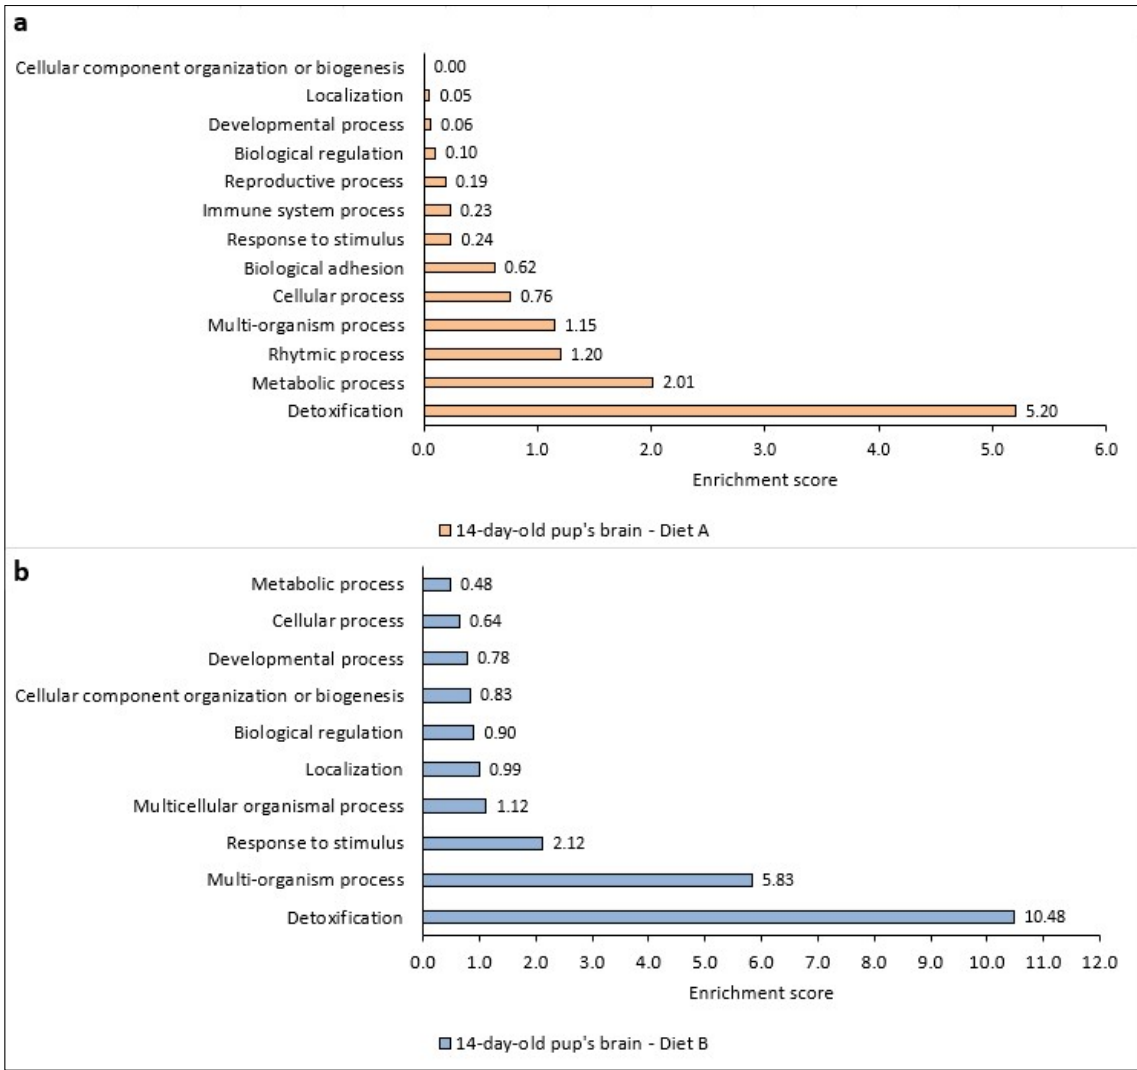

Annex 4. KEGG pathways affected in 14-day-old pup's brain from groups A and B compared to control, classified by enrichment score. KEGG, Kyoto encyclopedia of genes and genomes.

| KEGG Pathway              | Enrichment score | <i>P</i> | Genes in the pathway |
|---------------------------|------------------|----------|----------------------|
| <b>Diet A</b>             |                  |          |                      |
| Ribosome                  | 5.25             | 0.005    | <i>Rps29</i>         |
| Mineral absorption        | 3.25             | 0.039    | <i>Mt2A</i>          |
| Long-term depression      | 3.00             | 0.050    | <i>Ppp1r17</i>       |
| Glutamatergic synapse     | 2.37             | 0.093    | <i>Slc1a6</i>        |
| Parkinson's disease       | 2.20             | 0.111    | <i>Atp5e</i>         |
| Oxidative phosphorylation | 2.20             | 0.111    | <i>Atp5e</i>         |
| Alzheimer's disease       | 1.97             | 0.139    | <i>Atp5e</i>         |
| Huntington's disease      | 1.93             | 0.145    | <i>Atp5e</i>         |
| Metabolic pathways        | 0.41             | 0.666    | <i>Atp5e</i>         |
| <b>Diet B</b>             |                  |          |                      |
| African trypanosomiasis   | 4.60             | 0.010    | <i>Hba-a1</i>        |
| Mineral absorption        | 4.33             | 0.013    | <i>Mt2A</i>          |
| Malaria                   | 4.23             | 0.015    | <i>Hba-a1</i>        |
